# Supplementary material for: Implementation Potential of Moral Reconation Therapy for Criminal Recidivism in Mental Health Residential Programs
Source: Atypon-hosted journal article supplement (doi:10.1176/appi.ps.202100089), 2022-01-26
Supplement: appi.ps.202100089.ds001.pdf [file appi.ps.202100089.ds001.pdf]

Patient Interview Guide.

**General Experience with Moral Reconciliation Therapy (MRT)**

What is your understanding of MRT in terms of who it is for and what it is intended to teach Veterans?  
Tell me about your overall experience with MRT.  
What did you like about MRT?  
What did you dislike about MRT?

**Reach**

Why did you decide to participate in the research study?  
How could we encourage other Veterans to participate in MRT?  
How could we make MRT more appealing so that more Veterans will participate?

**Patient Engagement**

Before discharging from the Domiciliary, did you drop out or stay in the MRT groups?

*[For those who stayed in the group]*

Why did you stay in the group?

Did you have any particular challenges with attending the MRT groups? [If 'Yes'] How did you overcome these challenges?

*[For those who dropped out of the group]*

Why did you drop out of the group?

*[For those who stayed in the group]*

What types of rewards or incentives would keep others from dropping out of MRT?

Why types of consequences would keep others from dropping out of MRT?

*[For those who dropped out of the group]*

Why types of rewards or incentives would have kept you from dropping out of MRT?

Why types of consequences would have kept you from dropping out of MRT?

**Effectiveness**

What personal goals were you hoping MRT would help you with?

To what extent has MRT impacted (either positively or negatively) your treatment progress?

To what extent has MRT impacted (either positively or negatively) your quality of life?

What would make MRT more effective?

**Context**

How would you describe the 'fit' of MRT with other services in the Domiciliary?

Was there anything about MRT that seemed to contradict what you were learning in other services you received in the Domiciliary?

**Suggested Modifications and Closing Comments:**

What changes, if any, would you make to the intervention and why?

Is there anything you would like to add to our conversation today regarding your experience with MRT?

## Staff Interview Guide.

### **Background**

Tell me about your role in VA. What is your training or specialty?

### **General Experience with Moral Reconciliation Therapy (MRT)**

Tell me about your experience with MRT.

*[If interviewee was an MRT group facilitator on the project]*

Did you like facilitating the MRT groups? Why or why not?

Tell me about any conversations you had with Veterans about their participation in MRT.

### **Reach**

What steps could be taken to make MRT more appealing so that more Veterans will participate?

### **Patient Engagement**

For Veterans who stayed engaged in MRT while they were in the Domiciliary, what helped them do so?

For those who did not stay engaged while they were in the Domiciliary, what kept them from doing so?

What types of rewards or incentives would keep Veterans engaged in MRT?

### **Effectiveness**

Did Veterans experience any benefits from MRT? If yes, please describe.

Did Veterans experience any negative consequences from MRT? If yes, please describe.

What outcomes should be measured to evaluate the effectiveness of MRT for Veterans in Domiciliaries?

What would make MRT more effective in terms of reducing Veterans' risk for recidivism?

### **Adoption**

What barriers did you or other staff experience with adopting MRT into your Domiciliary?

What might get in the way of other Domiciliaries adopting MRT?

What would make it easier for Domiciliaries to adopt MRT?

### **Implementation**

What types of resources would assist Domiciliary staff in delivering MRT as intended?

How does MRT need to be tailored to Domiciliaries while still being delivered as intended?

What is the greatest barrier to delivering MRT as intended in a Domiciliary?

### **Maintenance**

What resources will be needed to maintain MRT in Domiciliaries over the long term?

What changes could be made to integrate MRT into regular practice in Domiciliaries?

Would you like to see the MRT groups continue in your program? Why or why not?

### **Context**

How would you describe the 'fit' of MRT with the curriculum in the Domiciliary? Please describe.

What should be VA's role in treating criminal thinking and recidivism risk in Veterans?

Does MRT have any added value in reducing Veterans' risk for recidivism, above and beyond other treatment services that VA provides?

### **Suggested Modifications and Closing Comments:**

What changes, if any, would you make to MRT and why?

Is there anything you would like to add to our conversation today regarding MRT and how it could be implemented in VA Domiciliaries on a routine basis?
